# Supplementary material
Source: PubMed Central journal article supplement (PMC4556127)
Supplement: NIHMS717306-supplement-supplement_1.pdf [file NIHMS717306-supplement-supplement_1.pdf]

## Supplemental Materials

### List of Artworks

1. *A Boy with a flying squirrel (Henry Pelham)*, 1765, John Singleton Copley (1738–1815), Oil on canvas
2. *Abstract Painting*, 1984, Gerhard Richter (1932- present), Oil on canvas.
3. *African Patterns*, 2012, Jaxine Cummins, Acrylic on canvas.
4. *Akrura's Vision of Vishnu/Krishna*, c. 1760-1765. Unknown (India, Himachal Pradesh). Opaque watercolor with gold on paper.
5. *An Allegory*, c. 1580-1585, El Greco (141-1614), Oil on canvas.
6. *Andy Warhol*, 2010, Mr. Brainwash (1966- present), Screenprint.
7. *Avenue de l'Opéra, soleil, matinée d'hiver*, 1898, Camille Pissarro (1830-1903), Oil on canvas.
8. *Birth of Christ*, c. 1405, Andrei Rublev (c. 1360-1430), Tempera.
9. *Boulevard Montmartre*, 1897, Camille Pissarro (1830-1903), Oil on canvas.
10. *Bouquet of Flowers in a Faience Vase*, c. 1600–1620. Jan Brueghel the Younger (1601–1678). Oil on wood.
11. *Cave paintings from Lascaux close up*, c. 15000 BC
12. *Children of Africa*, 2012, Jaxine Cummins, Goldleaf media.
13. *Children Playing on the Beach*, 1884, Mary Cassatt (1844-1926). Oil on canvas.
14. *Circus*, 1890-91, Georges Seurat (1859-1891), Oil on canvas.
15. *Cloud Study*, c. 1822. John Constable (1776–1837, Brit.). Oil on paper.
16. *Composition 8*, 1923, Vasily Kandinsky (1866-1944), Oil on canvas.
17. *Convergence*, 1952, Jackson Pollock (1912-1956), oil on canvas.
18. *Crucifixion*, 1565, Jacopo Tintoretto (1518-1594), Oil on canvas.
19. *Crucifixion*, c. 1265, Cimabue (1240-1302), distemper on wood.
20. *Church Street El*, 1920, Charles Sheeler (1883-1965), Oil on canvas.
21. *Death of Lucretia*, 1730, Ludovico Mazzanti (1686-1775), Oil on canvas.
22. *Death on Pale Horse*, 1796, Benjamin West (1738-1820), Oil on canvas.
23. *Der Maler*, 1869, Honoré Daumier (1808-1879), Oil on wood.
24. *Wanderer among the sea of fog*, 1818, Caspar David Friedrich (1774-1840), Oil on canvas.
25. *The Young Eastern Woman*, c. 1838. Friedrich Amerlin (1803–1887), Oil on fabric.
26. *Ecce Homo*, c. 1615-1620, Giulio Cesare Procaccini (1574-1625), Oil on canvas.
27. *Egypt Papyrus with elements most prominent of the antique Egypt*, c. 3000 BC, Unknown, Color on papyrus.
28. *Entrée du village de Voisins*, 1872, Camille Pissarro (1830-1903), Oil on canvas.
29. *Erna with Cigarette*, 1915, Ernst Ludwig Kirchner (1880-1938), Oil on canvas.
30. *Eugène Manet on the Isle of Wight*, 1875, Berthe Morisot (1841-1895), Oil on canvas.
31. *Femme et enfant au balcon*, 1872, Berthe Morisot (1841-1895), Oil on canvas.
32. *Fudesute mountain near Sakanoshita (Sakanoshita fudesutemine)*, no. 49 from the series *Fifty-three Stations of the Tokaido (Tokaido gosantsugi no uchi)*, c. 1832-1833, Hiroshige (1797-1858), Color woodblock.
33. *Greek Slave*, 1870, Jean-Léon Gérôme (1824-1904), Oil on canvas.
34. *Hercules Resting*, 1595-7, Annibale Caracci (1560-1609), black and white chalk on paper.

## RUNNING HEAD: In the working memory of the beholder

35. *Immaculate Conception with Saints Francis of Assisi and Anthony of Padua*, 1650, Giovanni Benedetto Castiglione (1609-1664), Oil on canvas.
36. *Interior*, 2012, Yue Minjun (1962- present), Oil on canvas.
37. *Jaguar Attacking a Horseman*, 1855, Eugène Delacroix (1798-1863), Oil on canvas.
38. *Jour Gris, Bords de l'Oise*, 1878, Camille Pissarro (1830-1903), Oil on canvas.
39. *Julius Caesar and Attendants (from the Nine Heroes Tapestries)*, c. 1400-1410, South Netherlandish, Wool warp and wefts.
40. *Krishna's Longing for Radha, from the Gita Govnda of Jayadeva*, c. 1820-1825, Kangra School Lambagraon series, Ink and color on paper.
41. *Last Judgment*, c. 1537-1541, Michelangelo (1475-1564), fresco.
42. *Landscape with a lake*, 1860-73, Jean Baptiste Camille Corot (1796-1875), Oil on canvas.
43. *L'archeologo*, 1971, Giorgio de Chirico (1888-1978), Oil on canvas.
44. *L'homme à la pipe (Man with pipe)*, 1920, Fernand Lèger (1881-195), Oil on canvas.
45. *Le repas*, 1891, Paul Gauguin (1848-1903), Oil on canvas.
46. *Les Demoiselles des bords de la Seine*, 1856, Gustave Courbet (1819-1877), Oil on canvas.
47. *Live Changchun*, 2009, Dong Sin Kim, Painting on paper.
48. *Lunar*, c. 1921, Alice Park Barney (1861-1931). Oil on canvas.
49. *Magenta, Black, Green on Orange*, 1947, Mark Rothko (1903-1970), Oil on canvas.
50. *Margarete*, 1981, Anselm Kiefer (1945-present), Oil and bundles of straw on canvas.
51. *Martyrdom of Saint Matthew*, c. 1600, Caravaggio (1571-1610). Oil on canvas.
52. *Metamorphosis of Narcissus*, 1937, Salvador Dali (1904-1989), Oil on canvas.
53. *Mile of a string*, 1942, Marcel Duchamp (1887-1968), photo of an installation.
54. *Moses*, 1945, Frida Kahlo (1907-1954), Oil on canvas.
55. *Mrs. Benjamin Hallowell*, 1766/1767, John Singleton Copley (1738–1815), Oil on canvas.
56. *Narcissus*, c. 1597–1599, Caravaggio (1571-1610). Oil on canvas
57. *Natura morta con cupola di San Pietro*, 1941-43, Gino Severini (1883-1966), Oil on wood.
58. *Nigredo*, 1984, Anselm Kiefer (1945-present), multimedia mounted on canvas.
59. *Nocturne*, 1996, Hughie Lee-Smith (1915-1999), Lithograph.
60. *Nudo di spalle*, 1909, Umberto Boccioni (1882-1916), Oil on canvas.
61. *Number 11 (Blue poles)*, 1952, Jackson Pollock (1912-1956), enamel on canvas.
62. *Odalisque with Raised Arms*, 1923, Henri Matisse (1869-1954), Oil on canvas.
63. *Oranges in Tissue paper*, 1890, William McCloskey (1859-1941), Oil on canvas.
64. *Pierre-Joseph Proudhon and his children*, 1853, Gustave Courbet (1819-1877), Oil on canvas.
65. *Pieta*, 1530, Agnolo di Cosimo Bronzino (1503-1572), Oil on canvas.
66. *Portrait*, 1935-40, Gino Severini (1883-1966), Oil on canvas.
67. *Portrait of a boy*, 2<sup>nd</sup> century, Unknown artist.
68. *Portrait of a Man Drinking*, c. 1581-1584, Annibale Carracci (1560-1609), Oil on wood.
69. *Portrait of a woman*, 1851, Jean-Léon Gérôme (1824-1904), Oil on canvas.
70. *Portrait of a Woman Suffering from Obsessive Envy (The Hyena)*, 1822, Jean Louis Théodore Géricault (1791-1884), Oil on canvas.
71. *Ragamala Illustration, Scene Hindola Raga*, 17<sup>th</sup> century, attributed to Indischer Malar Um, Painting on paper.
72. *Railway*, 1873, Edouard Manet (1832-1883), Oil on canvas.

## RUNNING HEAD: In the working memory of the beholder

73. *Rainbow under the sea*, 2009, Heo Su Young, Oil on paper.
74. *Relief of Nebhepetre Mentuhotep II*, c. 2040-2010 B.C., Painted limestone.
75. *Ring around the Rosey*, 1949, Robert Gwathmey (1903-1988), Color screenprint.
76. *Roger Delivering Angelica*, 1819, Jean Auguste Dominique Ingres (1780-1867), Oil on canvas.
77. *Sakyamuni Descending the Mountain after Asceticism*, 13<sup>th</sup> century, Liang Kai (c. 1140-1210), Hanging scroll, ink and light color on paper.
78. *Self-portrait with Thorn Necklace and Hummingbird*, 1940, Frida Kahlo (1907-1954), Oil on canvas.
79. *Self-portrait*, 1912, Gino Severini (1883-1966), Oil on canvas.
80. *Self-portrait with pink background*, 1875, Paul Cézanne (1839-1906), Oil on canvas.
81. *Serpentine Gallery Pavilion (photograph)*, 1970, Zaha Hadid, photograph.
82. *Sita in the Garden of Lanka, From the Ramayana epic of Valmiki*, c. 1725, Guler, Color and gold on paper.
83. *Sleeping Venus*, 1510, Giorgione (1470-1510), Oil on canvas.
84. *Small Pleasures*, 1913, Vasily Kandinsky (1866-1944), Oil on canvas.
85. *Spoiled Child*, c. 1760, Jean-Baptiste Greuze (1725-1805), Oil on canvas.
86. *St. Anthony Reading*, 1519, Albrecht Dürer (1471-1528), engraving.
87. *Stela of Pakhery*, Dynasty 26, 664-525 BC, Unknown artist.
88. *Stepping Out*, 1978, Roy Lichtenstein (1923-1997), Oil on canvas.
89. *Still Life with Flowers, Shells, A Shark's Head, and Petrifications*, c. 1819. Antoine Berjon (1754–1843), Oil on canvas.
90. *Still life with fruit*, c. 1601-1605, Caravaggio (1571-1610). Oil on canvas
91. *The Battle of La Hogue*, 1778, Benjamin West (1738-1820), Oil on canvas.
92. *The Circus (Jazz)*, 1943, Henri Matisse (1869-1954), Stencil.
93. *The Dream*, 1913, Pablo Picasso (1881-1973), Oil on canvas.
94. *The Nymph of the Lo River*, 1696, 1756, or 1816, Chinese artist (unknown), Ink and color on silk.
95. *The Entombment of Christ*, c. 1602-1603, Caravaggio (1571-1610). Oil on canvas
96. *The fight between carnival and Lent*, 1559, Pieter Brueghel (c. 1525-1569), Oil on wood.
97. *The Garden of Earthly Delights*, c. 1480-1505, Hieronymus Bosch (c. 1450-1516), Oil on oak.
98. *The Judgment of Paris*, c. 1517-1520, Raphael (1483-1520), engraving.
99. *The Nightmare*, 1781, Henry Fuseli (1741-1825), Oil on canvas.
100. *The smaller majority*, 2009, Heo Su Young, Pencil on paper.
101. *The Story of Nastagio degli Onesti: The Banquet in the Pine Forest*, 1483, Sandro Botticelli (1445-1510), Tempera.
102. *The Temptation of St. Anthony*, 1490, Hieronymus Bosch (c. 1450-1516), Oil on panel.
103. *The Two Guides*, 1875, Winslow Homer (1836-1910), Oil on canvas.
104. *The Wounded Deer*, 1946, Frida Kahlo(1907-1954), Oil on masonite.
105. *Trinity*, 1411 or 1425-27, Andrei Rublev (c. 1360-1430), Tempera.
106. *Triumphant Child*, 1946, Walter Quirt (1902-1968), Oil on canvas.
107. *Two Apostles*, c. 1325-1337, Workshop of Giotto di Bondone (c. 1266-1337), Tempera on panel.
108. *Two women–House of Women series*, c. 2009, Charles Sekano (1945-present), pastels on paper.

RUNNING HEAD: In the working memory of the beholder

109. *Untitled*, c. 2003, Cindy Sherman (1954-present), lamda c-print
110. *Untitled Film Still #58*, 1980. Cindy Sherman (1954-present), Gelatin silver print.
111. *Untitled*, 1989, Gerard Richter (1932- present), Oil on canvas.
112. *Untitled*, 1985, Willem de Kooning (1904-1997), Oil on canvas.
113. *Untitled*, 1950, Jackson Pollock (1912-1956), oil on canvas.
114. *Violin and Candlesticks*, 1910, Georges Braque (1882-1963), Oil on canvas.
115. *Visitation*, c. 1529, Jacopo Pontormo (1494-1557), Oil on canvas.
116. *Wallace Bournes*, 1994, Gerhard Richter (1932- present), Oil on canvas.
117. *Woman at Yeondang*, late 18<sup>th</sup> century, Shin Yun-bok (1758-unknown), painting on paper.
118. *Woman I*, 1952, Willem de Kooning (1904-1997), Oil on canvas.
119. *Xie An at East Mountain*, late 13<sup>th</sup> century, Lou Guan (Southern Song to Yuan period), ink and color on silk.
120. *Zen Abstract*, 2012, Jaxine Cummins, Oil on canvas.
